# Supplementary material for: Thermal stability of styrene/n-butyl acrylate RAFT-based copolymers
Source: Royal Society of Chemistry journal article supplement (doi:10.1039/c6py00301j), 2016-01-01

## Supporting Information for

# Thermal stability of styrene/n-butyl acrylate RAFT-based copolymers

E. V. Chernikova,\* A. V. Plutalova, E.S. Garina, and D. V. Vishnevetsky

*Polymer Department, Faculty of Chemistry, Lomonosov Moscow State University, Leninskie gory 1/3, Moscow, 119991, Russian Federation, , Fax: +7 495 9397104, Tel: +7 495 9395406;*

*E-mail: chernikova\_elena@mail.ru*

## Table of Contents

|                                                                                                                                                                                                                                                                                                                                                                                                                                                                                                                                                                                                        |   |
|--------------------------------------------------------------------------------------------------------------------------------------------------------------------------------------------------------------------------------------------------------------------------------------------------------------------------------------------------------------------------------------------------------------------------------------------------------------------------------------------------------------------------------------------------------------------------------------------------------|---|
| <b>Experimental Procedures</b> .....                                                                                                                                                                                                                                                                                                                                                                                                                                                                                                                                                                   | 3 |
| <b>Fig. S1.</b> The absorption spectra of (a) BTC (1), PS synthesized using BTC (2), and PS precipitated after heating with the 100-fold excess of AIBN (3) in CHCl <sub>3</sub> ; (b) CPDTC in methanol (1), PS synthesized using CPDTC in CHCl <sub>3</sub> (2), PS precipitated after heating with the 100-fold excess of AIBN in CHCl <sub>3</sub> (3), and supernatant in methanol/benzene mixture (4).....                                                                                                                                                                                       | 4 |
| <b>Fig. S2.</b> The SEC curves normalized by the unit area for PS after heating with AIBN in benzene solution at 80°C for 2 (1), 4 (2), and 22 h (3); [PS] <sub>0</sub> = 4×10 <sup>-3</sup> mol/L and [AIBN] <sub>0</sub> = 4×10 <sup>-1</sup> mol/L .....                                                                                                                                                                                                                                                                                                                                            | 5 |
| <b>Fig. S3.</b> The SEC curves normalized by the unit area for (a) PS–PBA–PS ( <i>M<sub>n</sub></i> = 2×10 <sup>4</sup> ) before (1) and after thermal treatment in the inert atmosphere at 200°C for 6 (2), 24 (3), 48 (4) and 72 h (5); (b) chain-extended polymers formed via styrene polymerization initiated by AIBN in the presence of block copolymers treated at 200 °C for 6 (1), 24 (2), 48 (3) and 72 h (4); (c) PS–PBA–PS ( <i>M<sub>n</sub></i> = 14×10 <sup>4</sup> ) before (1) and after thermal treatment in inert atmosphere at 200 °C for 6 (2), 24 (3), 48 (4) and 72 h (5). ..... | 5 |
| <b>Fig. S4.</b> UV-vis spectra in chloroform for (a) PS–PBA–PS ( <i>M<sub>n</sub></i> = 2×10 <sup>4</sup> ) before (1) and after thermal treatment in the inert atmosphere at 200°C for 6 (2), 24 (3), 48 (4) and 72 h (5); PS–PBA–PS ( <i>M<sub>n</sub></i> = 14×10 <sup>4</sup> ) before (1) and after thermal treatment in the inert atmosphere at 200°C for 6 (2), 24 (3), 48 (4) and 72 h (5) .....                                                                                                                                                                                               | 6 |
| <b>Fig. S5.</b> The instantaneous diad composition A <sub>BA</sub> A <sub>BA</sub> (a), A <sub>BA</sub> A <sub>St</sub> (b), and A <sub>St</sub> A <sub>St</sub> (c) calculated according to the terminal unit model using <i>r<sub>St</sub></i> = 0.88, <i>r<sub>BA</sub></i> = 0.20 for the monomer mixtures with various content of styrene: 10 (1), 20 (2), 30 (3), 40 (4), 50 (5) and 90 mol % (6).....                                                                                                                                                                                           | 7 |

|                                                                                                                                                                                                                                                                                                   |    |
|---------------------------------------------------------------------------------------------------------------------------------------------------------------------------------------------------------------------------------------------------------------------------------------------------|----|
| <b>Fig. S6.</b> The SEC curves normalized by the unit area for copolymers Cop2 (a), Cop3 (b), and Cop4 (c) before (1) and after heating with the 100-fold excess of AIBN (2), the products of thermal treatment in the inert atmosphere for 6 h at 140 (3), 160 (4), 180 (5) and 200°C (6). ..... | 9  |
| <b>Fig. S7.</b> The calibration curve based on narrow dispersed linear polystyrene standards ranging from 800 to $2 \times 10^6$ g mol <sup>-1</sup> .....                                                                                                                                        | 10 |
| <b>Fig. S8.</b> The IR-spectrum of styrene/ <i>n</i> -butyl acrylate copolymer synthesized from styrene the <i>n</i> -butyl acrylate monomer mixture (20 : 80 mol %) using BTC at a monomer conversion of ~98% .....                                                                              | 10 |

## Experimental Procedures

### *Synthesis of homopolymers*

Polystyrene (PS), poly(*n*-butyl acrylate) (PBA) were synthesized via the RAFT polymerization using dibenzyl trithiocarbonate (BTC) as a RAFT-agent and AIBN as a radical initiator. For PS synthesis, 0.580 g of BTC (0.2 mol/L) and 0.0164 g of AIBN ( $10^{-2}$  mol/L) were dissolved in 10 ml of the freshly distilled styrene. For PBA synthesis, 0.290 g of BTC (0.1 mol/L) and 0.00164 g of AIBN ( $10^{-3}$  mol/L) were dissolved in 10 ml of the freshly distilled *n*-butyl acrylate. Then, standard manipulations were used (see EXPERIMENTAL).

### *Synthesis of copolymers*

Styrene/*n*-butyl acrylate copolymers (Cop1 – Cop6) were synthesized via the same approach. Typically, 0.7660 g of BTC (0.2 mol/L) and 0.0216 g of AIBN ( $10^{-2}$  mol/L) were dissolved in 13.2 ml of the styrene/*n*-butyl acrylate mixture of the given content (Table S1). Then, standard manipulations for the preparation of the samples for polymerization were used (see above). In all cases, copolymerization was carried out at 80 °C and was stopped at a conversion of about 80 – 90%.

Table S1. Styrene/*n*-butyl acrylate mixtures for Cop1 – Cop6 synthesis.

| Copolymer | Styrene, ml | <i>n</i> -Butyl acrylate, ml |
|-----------|-------------|------------------------------|
| Cop1      | 1.2         | 12.0                         |
| Cop2      | 2.0         | 11.2                         |
| Cop3      | 3.0         | 10.2                         |
| Cop4      | 5.0         | 8.2                          |
| Cop5      | 5.8         | 7.4                          |
| Cop6      | 11.8        | 1.4                          |

### *Synthesis of block copolymers*

PS–PBA–PS and PBA–PS–PBA block copolymers were prepared via similar synthetic approach. For PS–PBA–PS synthesis, obtained PS (0.330 g) (see *Synthesis of homopolymers*) and AIBN (0.0017 g) were dissolved in 2 ml of the freshly distilled *n*-butyl acrylate. For the synthesis of PBA–PS–PBA, PBA (0.3637 g, see *Synthesis of homopolymers*) and AIBN (0.0040 g) were dissolved in 2 ml of the freshly distilled styrene. Then, standard manipulations were used for the preparation of the samples and polymerization of reaction mixtures.

**Fig. S1. The absorption spectra of (a) BTC (1), PS synthesized using BTC (2), and PS precipitated after heating with the 100-fold excess of AIBN (3) in  $\text{CHCl}_3$ ; (b) CPDTC in methanol (1), PS synthesized using CPDTC in  $\text{CHCl}_3$  (2), PS precipitated after heating with the 100-fold excess of AIBN in  $\text{CHCl}_3$  (3), and supernatant in methanol/benzene mixture (4).**

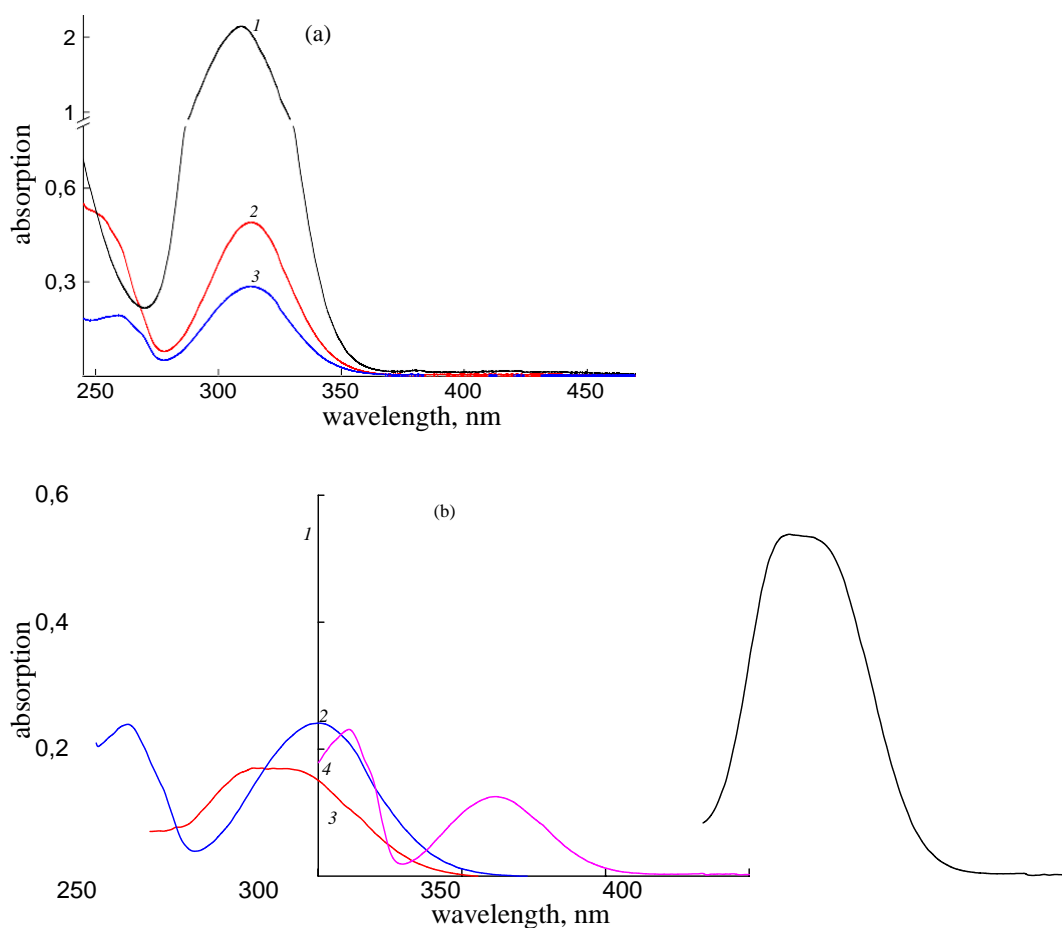

**Fig. S2.** The SEC curves normalized by unit area for PS after heating with AIBN in benzene solution at 80°C for 2 (1), 4 (2), and 22 h (3);  $[PS]_0 = 4 \times 10^{-3}$  mol/L and  $[AIBN]_0 = 4 \times 10^{-1}$  mol/L.

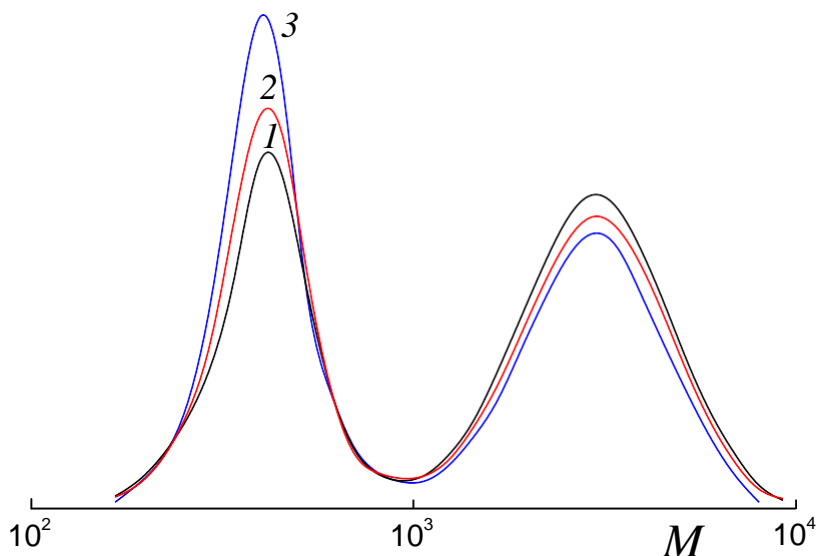

**Fig. S3.** The SEC curves normalized by unit area for (a) PS–PBA–PS ( $M_n = 2 \times 10^4$ ) before (1) and after thermal treatment in inert atmosphere at 200 °C for 6 (2), 24 (3), 48 (4) and 72 h (5); (b) chain extended polymers prepared by styrene polymerization initiated by AIBN in the presence of block copolymers treated at 200°C for 6 (1), 24 (2), 48 (3) and 72 h (4); (c) PS–PBA–PS ( $M_n = 14 \times 10^4$ ) before (1) and after thermal treatment in inert atmosphere at 200°C for 6 (2), 24 (3), 48 (4) and 72 h (5).

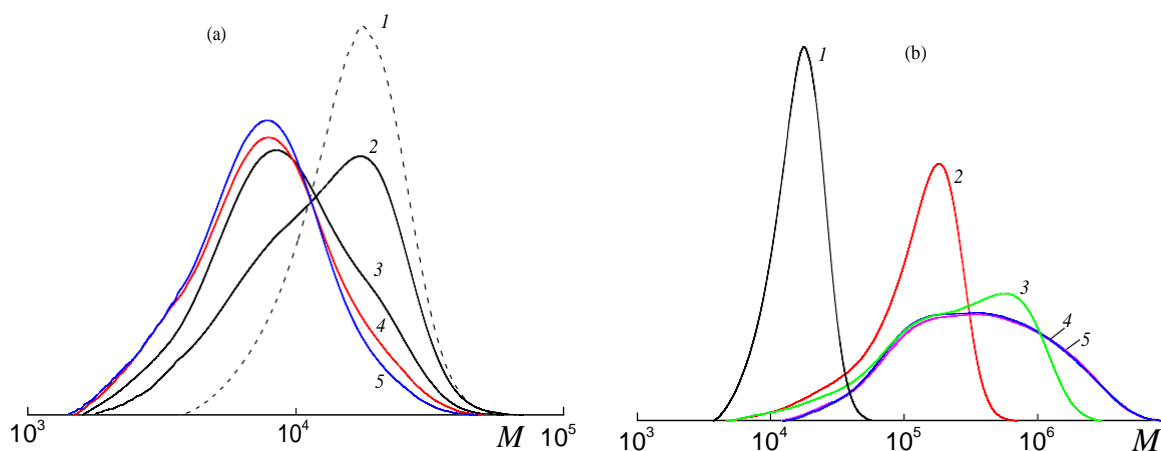

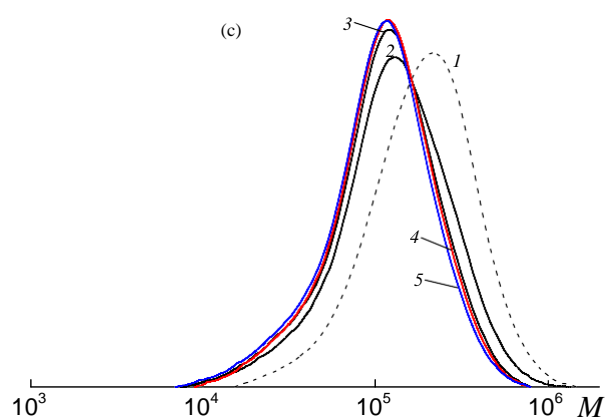

**Fig. S4.** UV-vis spectra in chloroform of (a) PS-PBA-PS ( $M_n = 2 \times 10^4$ ) before (1) and after thermal treatment in inert atmosphere at 200 °C for 6 (2), 24 (3), 48 (4) and 72 h (5); PS-PBA-PS ( $M_n = 14 \times 10^4$ ) before (1) and after thermal treatment in the inert atmosphere at 200 °C for 6 (2), 24 (3), 48 (4) and 72 h (5)

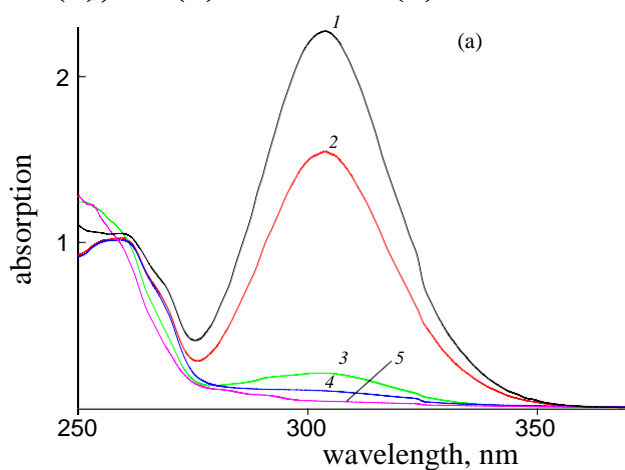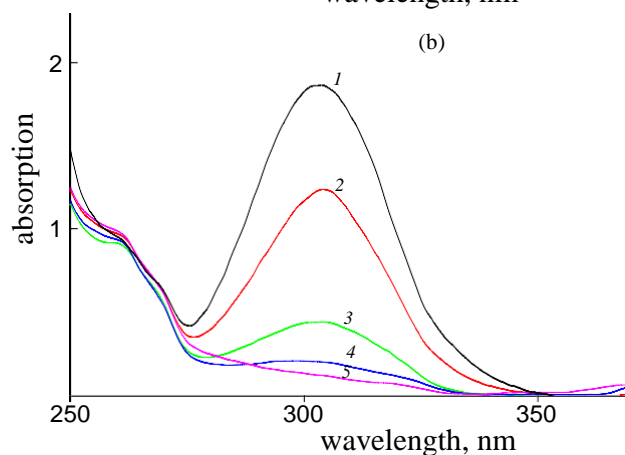

**Fig. S5. The instantaneous diad composition  $A_{BA}A_{BA}$  (a),  $A_{BA}A_{St}$  (b), and  $A_{St}A_{St}$  (c) calculated according to the terminal unit model using  $r_{St} = 0.88$ ,  $r_{BA} = 0.20$  for monomer mixtures with various content of styrene: 10 (1), 20 (2), 30 (3), 40 (4), 50 (5) and 90 mol. % (6).**

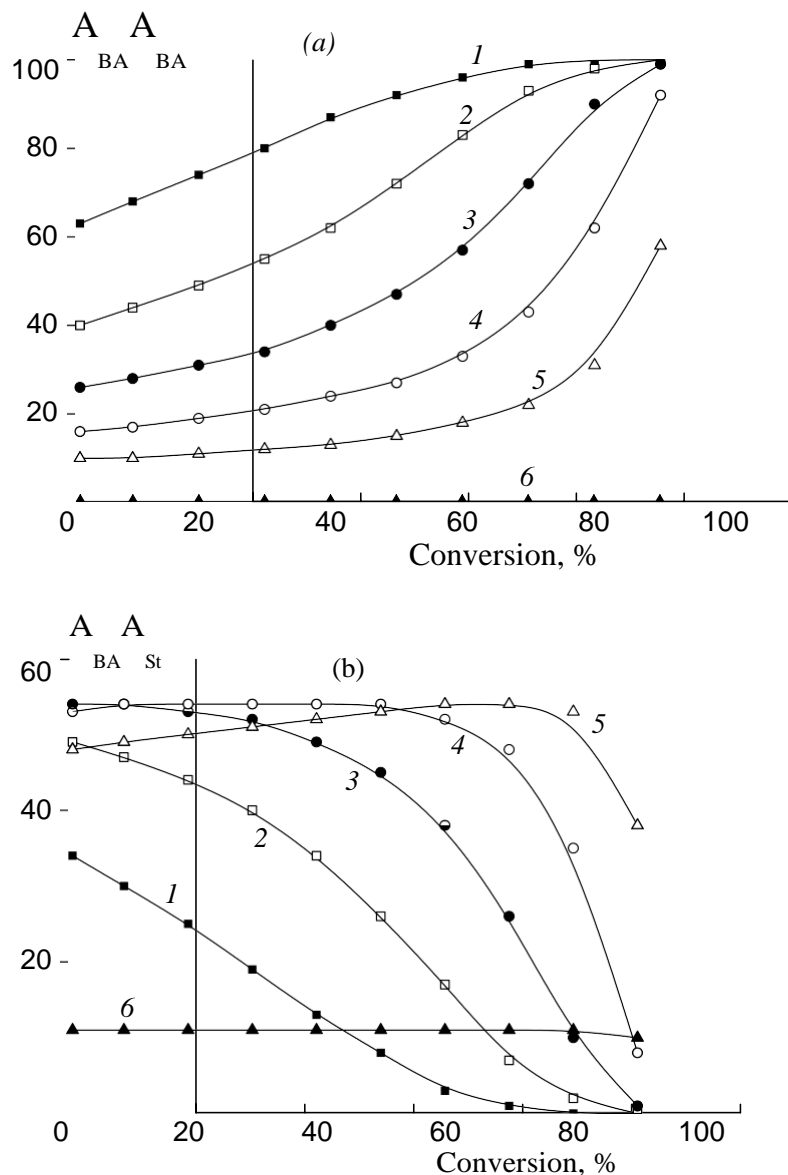

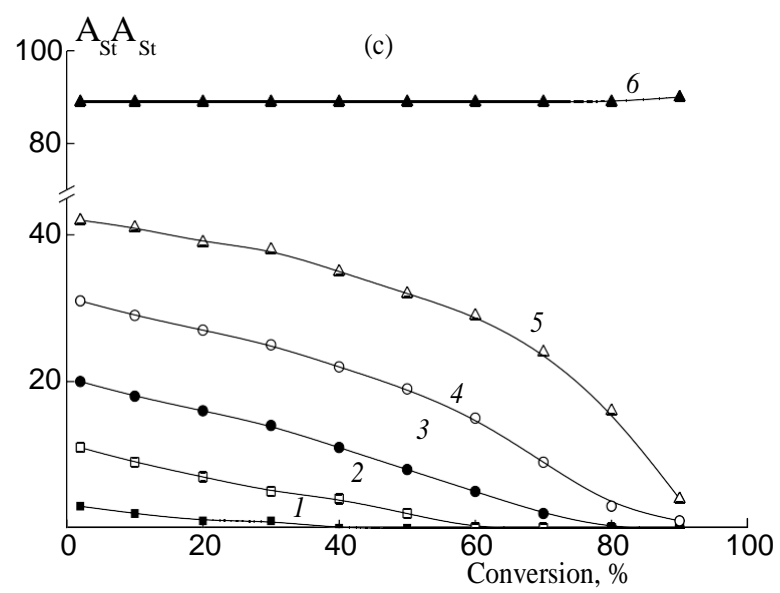

**Fig. S6.** The SEC curves normalized by the unit area for copolymers Cop2 (a), Cop3 (b), and Cop4 (c) before (1) and after heating with the 100-fold excess of AIBN (2), the products of thermal treatment in the inert atmosphere for 6 h at 140 (3), 160 (4), 180 (5) and 200°C (6).

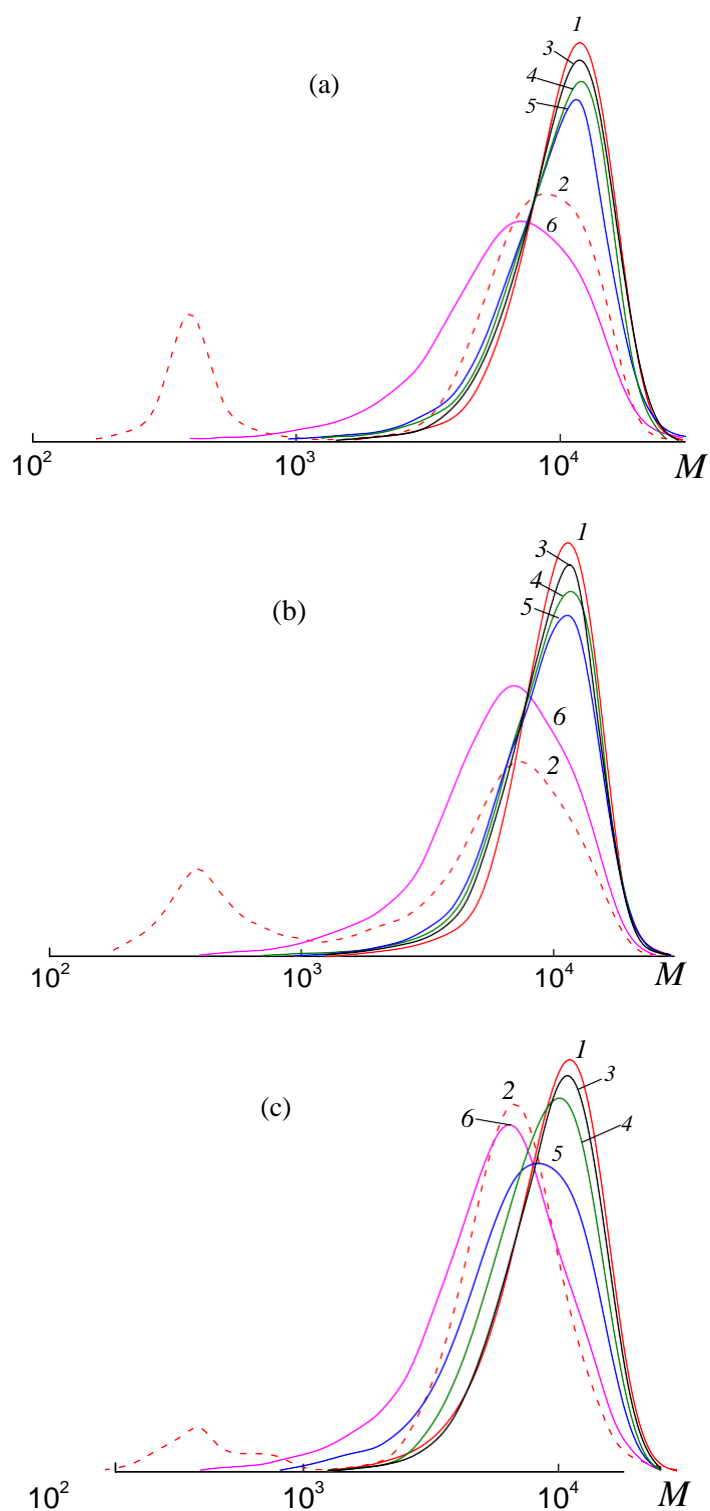

**Fig. S7.** The calibration curve based on narrow dispersed linear polystyrene standards ranging from 800 to  $2 \times 10^6$  g mol<sup>-1</sup>.

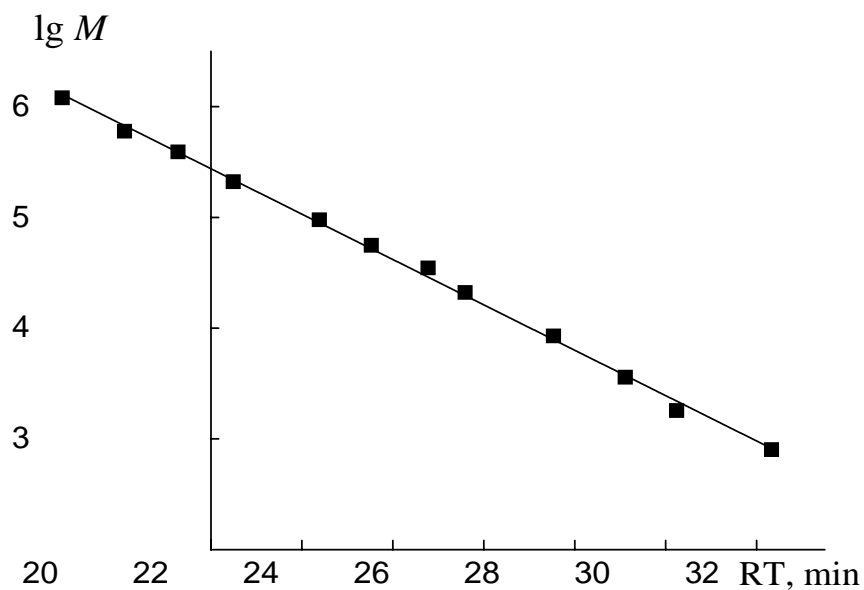

**Fig. S8.** The IR-spectrum of styrene/n-butyl acrylate copolymer synthesized from the styrene : n-butyl acrylate monomer mixture (20 : 80 mol %) using BTC at a monomer conversion of ~98%.

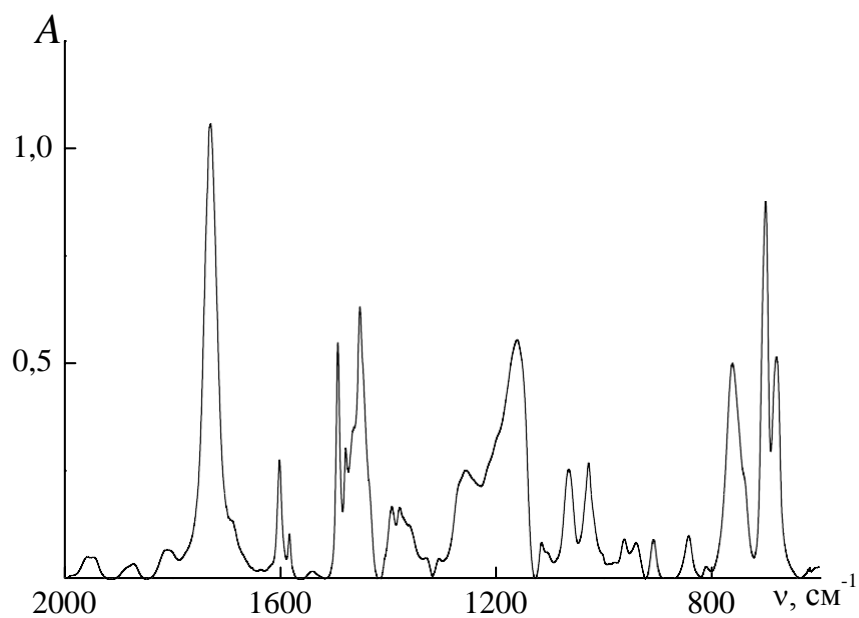

Supplement: c6py00301j1.pdf [file c6py00301j1.pdf]
